# Supplementary material
Source: publisher figshare collection journal article supplement (https://gsajournals.figshare.com/ndownloader/files/27742035)
Supplement: Supplementary file 1 [file 27742035]

Table S5. InterProScan analysis and comparison of *Metarhizium humberi* ESALQ1638 with other 10 *Metarhizium* genomes and outgroups.

| InterPro analysis | Families | Domains | Others |
| --- | --- | --- | --- |
| *Fusarium verticillioides* 7600 | 6,369 | 11,133 | 12,120 |
| *Aspergillus niger* SH-2 | 5,622 | 9,855 | 10,504 |
| *Trichoderma harzianum* T6776 | 5,478 | 9,776 | 10,815 |
| *Metarhizium guizhouense* ARSEF977 | 5,353 | 9,558 | 10,349 |
| *Metarhizium majus* ARSEF297 | 5,309 | 9,426 | 10,255 |
| *Metarhizium robertsii* ARSEF23 | 5,226 | 9,184 | 10,009 |
| *Metarhizium humberi* ESALQ 1638 | 5,186 | 9,039 | 9,722 |
| *Metarhizium anisopliae* BRIP53293 | 5,171 | 9,012 | 9,755 |
| *Metarhizium anisopliae* E6 | 5,164 | 8,996 | 9,738 |
| *Metarhizium anisopliae* ARSEF549 | 5,149 | 9,024 | 9,746 |
| *Metarhizium brunneum* ARSEF3297 | 5,146 | 8,914 | 9,627 |
| *Beauveria bassiana* ARSEF 2860 | 4,911 | 8,480 | 9,200 |
| *Metarhizium acridum* CQMa102 | 4,812 | 9,327 | 7,980 |
| *Metarhizium rileyi* RCEF4871 | 4,258 | 7,308 | 7,730 |
| *Metarhizium album* ARSEF1941 | 4,178 | 7,110 | 7,442 |
